1 **Dissection of the ‘Virgin-soil’ epizootic of African swine fever in Mizoram, a Northeast state of**  
2 **India**

3 Santhalembi Chingtham<sup>1</sup>, Freda Lalrohlui<sup>1</sup>, Abigail Remlalfakawmi<sup>2</sup>, C. Neihthangpuii<sup>2</sup>, Esther  
4 Lalzoliani<sup>2</sup>, Parimal Roychoudhury<sup>1</sup>, Prashant Kumar Subudhi<sup>1</sup> and Tapan Kumar Dutta<sup>1#</sup>

5 1. Department of Veterinary Microbiology, College of Veterinary Science and Animal Husbandry,  
6 Central Agricultural University, Selesih, Aizawl, Mizoram, India-796015.

7 2. Disease Investigation Laboratory, Directorate of Veterinary and Animal Husbandry, Government of  
8 Mizoram, Khatla, Aizawl, Mizoram, India-796005.

9 **Corresponding author**

10 Professor Dr. Tapan Kumar Dutta, MVSc, PhD

11 Head of Department of Veterinary Microbiology, College of Veterinary Science and Animal Husbandry,  
12 Central Agricultural University, Aizawl, Mizoram, India

13 Email: [tapandutta@rediffmail.com](mailto:tapandutta@rediffmail.com)

14 **Abstract**

15 This article aims to analyse the first-time emergence of African swine fever (ASF) in Mizoram.  
16 We collated the outbreak data and identified the time and locations of ASF emergence. To understand the  
17 impact of the outbreak, we have calculated the morbidity rate, mortality rate, case fatality rate (CFR) and  
18 overall pig depopulation rate. We identified that ASF emerged in total 178 locations in all 11 districts of  
19 Mizoram between March-July 2021, after a peak in June, and the disease continued to spread till the end  
20 of 2021 before re-emergence in March 2022. The overall morbidity rate and mortality rate of ASF  
21 between March-July 2021 in Mizoram were estimated to be 33.8% and 31.1%, while the average  
22 morbidity rate and the mortality rate of 10 districts were found to be 29.5% and 27.6% respectively.  
23 Overall CFR of ASF between March-July 2021 was estimated to be 92.1% and the average of all 11  
24 districts was found to be 96.1%. Toward the end of 2021, the mortality rate increased by a total of 42.7%

25 change and an average of 25.3% change. We estimated an overall 70% depopulation of susceptible pigs  
26 by disease and culling by end of 2021. This report is evidence that ASF has remained catastrophic and,  
27 keeping in view the complex nature and history of the virus on genotype adaptability associated with a  
28 high propensity for transboundary expansion, the virus continues to be a threat.

29 **Keywords:** African swine fever, transboundary animal disease, Mizoram, swine.

30 **Running Title:** Emergence of African Swine Fever in Mizoram, India

31

32

33

34

35

36

37

38

39

40

41

42

43

44

45

46

47

48

## 49 **Introduction**

50 African swine fever (ASF) is a disease of domestic, feral and wild *Sus scrofa* (pig) notifiable to  
51 World organisation for Animal Health (WOAH) [1], bearing serious negative implications on national  
52 and international trade and economy [2]. It is caused by infection with a complex enveloped DNA virus  
53 called the African swine fever virus (ASFV) - the only known DNA arbovirus and the only member of the  
54 genus *Asfivirus*, family *Asfaviridae* [1,3,4]. First detected in Kenya in 1909 [5], ASF is endemic to the  
55 Sub-Saharan Africa [12] and the virus is known to be maintained in the eastern and southern Africa in a  
56 natural sylvatic cycle of vertebrate reservoir hosts - the African wild suids (Warthogs, bushpigs, red river  
57 hog and giant forest hogs), and arthropod hosts - argasid ticks of *Ornithodoros moubata* complex that act  
58 as biological vector [1,3,7]. The original ASF virus ecology is complex in the sense that the infection  
59 pattern of the wild suid population and soft ticks varies with geographic location and virus genotype, and  
60 sporadic domestic cycle runs independently from and parallel to the sylvatic cycle with wild infected ticks  
61 more likely serving as accidental bridge [3]. Trans- and inter-continental expansion of the domestic cycle  
62 that began with ASF appearance in Portugal in 1957 and subsequently in other parts of Iberia and South  
63 America, Caucasus and Russia, to the rapid expansion in Eurasia recently is largely attributed to the  
64 horizontal transmission of the virus between pigs in domestic and wild population of *Sus scrofa* instigated  
65 by global trade and other cross-continental human activities, thereby, endangering the wild population of  
66 *Sus scrofa* while also magnifying the risk of virus maintenance in the wild population of susceptible suids  
67 and ticks in non-endemic regions [3,7,8]. The role of infected wild *Sus scrofa* (wild boar) in the ASF  
68 epidemiology is evident in the recent ASF outbreaks in Europe and parts of Asia where the transmission  
69 of ASF is reported to be dependent largely on wild boar population coupled with a low biosecurity in pig  
70 production systems [8]. These reports strongly imply that the complex yet stable ASF virus ecology and  
71 ASF epidemiology culminates to a challenge on risk and impact mitigation of ASF once the virus is  
72 introduced and established in a region. According to the biweekly update of WOAH report on global ASF

73 situation 74 countries have been affected during 2005 and 2022, and the disease has been reported as  
74 present in 45 countries affecting 1,191,000 pigs and more than 37,000 wild boars for the period between  
75 January 2020 and December 2022 [9]. In Asia, ASF emerged for the first time in China in August 2018  
76 and by 2021, 16 countries were already affected including India [8, 10].

77 Infection with ASF virus is manifested in multi syndromic forms of varying degrees of severity  
78 from hyperacute to chronic and asymptomatic depending on the virus strains, geographic location of  
79 incidence, hosts, vectors and other factors [3,7,4,11]. Incidence, particularly for the first time in a new  
80 location, is commonly associated with fatal outcomes of the most severe form in domestic, feral or wild  
81 *Sus scrofa* manifesting up to 100% mortality and case fatality rates [3]. Symptoms and lesions in the  
82 course of the disease, if not preceded by death, commonly involve haemorrhagic manifestations that have  
83 often led to confounding judgements in a first-time occurrence due to the resemblance to other endemic  
84 porcine haemorrhagic diseases like the classical swine fever, thereby impeding the process of specific  
85 impact mitigation of ASF [3,4].

86 In India, first laboratory confirmed ASF in domestic pigs was reported in January 2020 in 2  
87 districts of Arunachal Pradesh and 5 districts of Assam [10, 12], which are two neighboring states in the  
88 northeast region of the country. Arunachal Pradesh also shares national border with Nagaland, and  
89 international border with China, Myanmar and Bhutan, while Assam shares international border with  
90 Bangladesh and Bhutan, and national border with 5 other states in the northeast including Mizoram. Post  
91 the outbreaks in the two Northeastern states, multiple new outbreaks were reported in 5 different states  
92 within the Northeast region - Meghalaya and Manipur between August 2020 to November 2020,  
93 Nagaland and Mizoram in March 2021, and Sikkim in early March 2022 [12].

94 Mizoram is a state in the northeast region of India covering an area of approximately 21,087 sq  
95 km of mostly hilly terrain with 89% forest coverage [13], shares 3 national borders with Assam (123 km),  
96 Tripura (277 kms) and Manipur (95 kms) [14]. The state also shares 404 km and 318 km long

97 international borders with Myanmar and Bangladesh respectively. The state is an agrarian economy with  
98 backyard piggyery being one of major sources of local livelihood [15]. According to the 20th Livestock  
99 Census released in 2019 by the Department of Animal Husbandry and Dairying, Government of India, the  
100 total population of pigs in Mizoram was 2,83,021 (shown in Table 1) which is 82.2% of the total livestock  
101 population in Mizoram in 2019 [16]. Mizoram has 11 districts - Aizawl, Lunglei, Champhai, Mamit,  
102 Saitual, Khawzawl, Hnahthial, Lawngtlai, Serchhip, Kolasib, and Siahia [17]. In this article, we aim to  
103 provide an account on the ASF outbreak and attempt to analyze the impact of the first-time emergence of  
104 ASF in Mizoram while also highlighting the consolidation of risk factors, and the future threats. There is  
105 no historical record on prevalence of ASFV infection prior to the outbreak described in this article, and  
106 although a study on genetic characterization of ASFV from the same outbreak has been reported earlier  
107 [18], this is the first description of ASF in Mizoram. In this article, ASF outbreak events in 2021 have  
108 been collectively referred to as ‘first outbreak ’and the events in 2022 as ‘second outbreak ’and the focus  
109 of analysis and discussion is kept on the events in 2021.

## 110 **Methodology**

111 Data on the ASF outbreaks within Mizoram state was acquired from the State Department of  
112 Veterinary and Animal Husbandry, Government of Mizoram. The data was curated, and it consisted of  
113 the number of susceptible animal at specified epicentre locations within the districts of Mizoram state,  
114 number of suspected and/or laboratory confirmed cases, number of ASF induced deaths, number of culled  
115 pigs and number of families affected. Infection status or number of cases reported was based on clinical  
116 manifestation and laboratory confirmation of representative specimens. Initial laboratory confirmation by  
117 real-time PCR was performed at the ICAR-National Institute of High Security Animal Diseases, Bhopal  
118 (Madhya Pradesh), a national reference laboratory, and Northeast Regional Disease Diagnosis  
119 Laboratory, Guwahati (Assam), and subsequent laboratory detection of new appearances at different  
120 locations were done by PCR and rapid antigen tests at the diagnostic facility of the department of

121 Veterinary Microbiology, College of Veterinary Science and Animal Husbandry, CAU, Selesih, Aizawl,  
122 Mizoram.

### 123 *ASF epicentres and timeline of ASF appearance*

124 From the available data, the number of locations with first notification of the appearance of ASF  
125 between March 2021 and June 2021 in each of the 11 districts of Mizoram were identified. The locations  
126 within each district were then grouped month-wise to understand the month-wise distribution and first  
127 appearance of ASF for each district. The month in which the ASF appearances peaked was also identified.  
128 To determine the first onset of ASF within each district, a date-wise timeline is created consisting of  
129 reported dates of onset in different locations of each district. A number of locations and dates with  
130 overlapping ASF onset were also identified.

### 131 *Estimation of morbidity rate, mortality rate, case fatality rate and culling rate*

132 The ASF morbidity rate for each district was estimated using the available data on the number of  
133 susceptible pigs recorded for each affected location and the reported ASF cases during the period from  
134 first onset in March 2021 to July 2021. For the overall morbidity rate for the defined period in the whole  
135 of Mizoram the average of the estimates of each district is calculated. The total morbidity rate is  
136 calculated from the cumulative values of all districts. Except Saiha district, all 10 districts of Mizoram  
137 were considered for estimation of ASF morbidity rate. The formula below was used to calculate the  
138 morbidity rate:

$$139 \text{ Morbidity rate (\%)} = \{(Number\ of\ ASF\ cases) / (Number\ of\ susceptible\ pigs)\} \times 100$$

140 The ASF case fatality rate (CFR) for each district was estimated for the first half of the first  
141 outbreak using the available data on the number of reported ASF cases during the period from first onset  
142 in March 2021 to July 2021. For overall CFR (%) for the defined period in the whole of Mizoram the  
143 average of the estimates of each district is calculated. The total CFR (%) is calculated from the

144 cumulative values of all districts. All 11 districts were included in the assessment of CFR. The formula  
145 below was used to calculate the morbidity rate:

$$146 \quad CFR (\%) = \{(Number\ of\ deaths\ due\ to\ ASF) / (Number\ of\ ASF\ cases)\} \times 100$$

147 ASF mortality rate for each district was estimated in percentage for two time periods in the first  
148 outbreak using the available data on the number of susceptible pigs recorded for each affected locations  
149 and the reported ASF mortality during the period from first onset in March 2021 to July 2021, and the  
150 period from first onset in March 2021 to December 2021. For overall mortality rate for the defined  
151 periods in the whole of Mizoram the average of the estimates of each district was calculated. The total  
152 mortality rate was calculated from the cumulative values of all districts. Except Saiha district, all 10  
153 districts of Mizoram were considered for estimation of ASF mortality rate. The formula below was used  
154 to calculate the morbidity rate:

$$155 \quad Mortality\ rate (\%) = \{(Number\ of\ deaths\ due\ to\ ASF) / (Number\ of\ susceptible\ pigs)\} \times 100$$

156 Overall ASF induced age-wise mortality is also estimated for all 11 districts of both first outbreak  
157 in 2021 and second outbreak in 2022. The mortality was grouped under three age groups of below 3  
158 months, between 3-8 months and above 8 months. The mortality rate in each age group was not  
159 determined because of unavailable data on the age-wise number of susceptible pigs.

#### 160 *Estimation of culling rate and overall depopulation rate*

161 Culling rate was estimated for each district for two time periods - March 2021 to July 2021 and  
162 March 2021 to December 2021 using the formula below. Except Saiha district, all 10 districts of Mizoram  
163 were considered for estimation of culling rate. The number of culled pigs were also categorised into five  
164 groups according to body weight for each district.

$$165 \quad Culling\ rate (\%) = \{(Number\ of\ culled\ pigs) / (Number\ of\ susceptible\ pigs - Number\ of\ deaths\ due\ to\ ASF)\} \times 100$$

166

167 Overall depopulation status was estimated for each district for two time periods in the first  
168 outbreak - March 2021 to July 2021 and March 2021 to December 2021 using the data on number of  
169 deaths due to ASF infection and number of pigs culled. The depopulation rate was calculated using the  
170 estimated depopulation value and the number of susceptible pigs. The number and proportion of live pigs  
171 toward the end of 2021 were also estimated.

172  $Depopulation\ rate\ (\%) = \{(Number\ of\ deaths\ due\ to\ ASF + Number\ of\ culled\ pigs) / (Number\ of\ susceptible$   
173  $pigs)\} \times 100$

174 *ASF mortality and families affected in first outbreak and second outbreak*

175 To compare the district wise number of ASF induced pig mortality and families affected in the  
176 first and second outbreaks the percent proportion of mortality and affected families were calculated for  
177 each district for the first outbreak in 2021 and second outbreak in 2022.

## 178 **Results**

179 *ASF epicentres and timeline of ASF appearance*

180 ASF appeared in a total of 178 different locations for the first time in all 11 districts of Mizoram  
181 with different and overlapping dates of onset during March 2021 to July 2021. ASF appeared in 78  
182 locations in Aizawl district, 5 in Champhai, 6 in Hnahthial, 4 in Khawzawl, 3 in Kolasib, 3 in Lawngtlai,  
183 17 in Lunglei, 24 in Mamit, 12 in Saitual, 25 in Serchhip, and 1 in Siaha. The onset of ASF outbreak was  
184 seen in 6 locations within 6 districts in the month of March, 25 locations within 7 districts in April, 36  
185 locations in 6 districts in May, 74 locations in 7 districts in June, and 37 locations in 10 districts in July.  
186 The breakdown of month-wise appearances of ASF for each district is presented in Table 2. Total ASF  
187 appearances peaked in the month of June 2021 (Figure 1). A total of 87 dates from 9th March 2021 to  
188 31st July 2021 have been recorded with the onset of ASF in the above locations. Total 130 locations of 10  
189 districts (except Siaha) showed onset of ASF on 33 overlapping dates - 0 overlapping onset date in the  
190 month of March 5 in April with 13 locations within 5 districts, 4 in May with 24 locations within 6



191 districts, 16 in June with 67 locations within 7 districts, and 8 in July with 26 locations within 10 districts  
192 (Figure 1). The locations of the first-time onset of ASF in every district are shown in figure 1.

193 *Estimation of morbidity rate, mortality rate, and case fatality rate*

194 The overall morbidity rate of ASF in Mizoram in the initial period of the first outbreak (March-  
195 July 2021) was estimated to be 33.8% and the average morbidity rate of 10 districts was found to be  
196 29.5%. The overall mortality rate was determined to be 31.1% while the average mortality rate of 10  
197 districts was found to be 27.6%, the highest was in Lunglei with 41.8% while the lowest was in Kolasib  
198 with 2.13%. ASF mortality rate was also evaluated for the whole of first outbreak period (March-Dec  
199 2021) and total mortality rate was found to be 52.63% while the average mortality rate of 10 districts was  
200 48.2%, the highest was in Lawngtlai with 81.6% and the lowest was from Kolasib with 13.8%. The  
201 mortality rate increased by a total of 42.7% change and an average of 25.3% change toward the end of  
202 2021 (Figure 2), highest rise was observed in Lawngtlai with a 68% change while lowest rise was  
203 observed in Mamit with an 8.9% change in mortality rate from mid-2021 to end of 2021. Siaha district  
204 reported 4 cases and 4 deaths during March-July 2021 and 313 deaths by the end of 2021, however, the  
205 district could not be included in the assessment of morbidity rate and mortality rate as the data on number  
206 of susceptible pigs was not available for the district. Overall case fatality rate (CFR) of ASF in Mizoram  
207 in the initial period of the first outbreak (March-July 2021) was estimated to be 92.1% and the average  
208 CFR of all 11 district was found to be 96.1%, with highest CFR of 100% observed in 6 districts -  
209 Hnahthial, Khawzawl, Saitual, Kolasib and Siaha while a lowest of 76.5% seen in Mamit district. The  
210 district-wise breakdown of morbidity, mortality, morbidity rate, mortality rate and CFR are summarized  
211 in Table 3. Due to lack of information on the true number of cases for the period during March-December  
212 2021, the CFR could not be estimated for this period. The morbidity rate, mortality rate and CFR of all  
213 assessed districts and their average are shown in figure 2. Of the total ASF induced mortality of n=33,417,  
214 30.2% (n=10,093) was comprised of pigs in the age group below 3 months, 34.6% (n=11,552) in the age

215 group between 3-8 months and 35.2% (n=11,772) in the age group above 8 months of all 11 districts  
216 (Figure 2). Age-wise mortality rate could not be calculated because of the missing data on age-wise  
217 number of susceptible pigs.

218 In the second outbreak between March - June 2022 total mortality of 8770 (ASF induced deaths)  
219 was observed, however the morbidity rate, mortality rate, and CFR of ASF in the second outbreak could  
220 not be calculated because of unavailable data on the number of susceptible pigs recorded for each affected  
221 locations and the number of active cases. Out of total ASF induced mortality of 8770, 23.4% (n=2,048)  
222 was comprised of pigs in the age group below 3 months, 27.2% (n= 2,388) in the age group between 3-8  
223 months, and 35.2% (n=4,334) in the age group above 8 months of all 11 districts (Figure 2). Age-wise  
224 mortality rate could not be calculated because of the missing data on age-wise number of susceptible pigs.

#### 225 *Estimation of culling rate and overall depopulation rate*

226 A total of 6,360 pigs were culled during the period from March to July 2021 and a total of 11,177  
227 pigs were culled in the period from March to December 2021. Overall culling rates of 10 districts in both  
228 the time periods were estimated to be 14.7% and 37.1% respectively, while the average culling rates of 10  
229 districts in both the time periods were estimated to be 11.7% and 24.5% respectively. Four districts -  
230 Lawngtlai, Champhai, Khawzawl, Kolasib had 0% culling rate at all the locations of ASF outbreaks in  
231 2021 and Mamit district showed the highest culling rate of 88.5% end of 2021. A total of 44,594 pigs  
232 were depopulated (disease+culling) in Mizoram during the first outbreak of ASF (Table 4). Overall  
233 depopulation rate in Mizoram was estimated to be 41.2% in the period from March to July 2021 and  
234 70.2% in the period from March to December 2021, while the average depopulation rate of 10 districts in  
235 both the time periods were estimated to be 35.4% and 60.1% respectively. A total of 441 pigs were  
236 depopulated from Siaha district, however the district was not included in the assessment of the district-  
237 wise and overall culling rate and depopulation rate because of unavailable data on the number susceptible  
238 pigs at the locations. District-wise and overall depopulation status of the first ASF outbreak are shown in

239 figure 3. A total of 19,009 pigs (30.2%) were estimated to be alive by the end of 2021 out of 62,895  
240 susceptible pigs. The district-wise status of live pigs by end of first outbreak is shown in Figure 3.

#### 241 *ASF mortality and families affected in first outbreak and second outbreak*

242 In the first outbreak between March-December 2021 48.3% of the total mortality (n=33,417) in  
243 Mizoram was from Aizawl district, 11.3% from Serchhip, 13.3% from Lunglei, 8.5% from Mamit, 3.1%  
244 from Khawzawl, 4.2% from Hnathial, 4.6% from Saitual, 3.6% Lawngtlai, 1.6% from Champhai, 0.5%  
245 from Kolasib, and 0.9% from Siahia. While in the second outbreak between March to June 2022., 23.1%  
246 of the total mortality (n=8,770) in Mizoram was from Aizawl district, 0.8% from Serchhip, 0.1% Lunglei,  
247 7.2% from Mamit, 6.6% from Khawzawl, 2.0% from Hnahthial, 4.0% from Saitual, 0.2% from  
248 Lawngtlai, 36.1% from Champhai and 19.7% from Kolasib. The total ASF induced mortality from both  
249 the outbreaks is 42,187, out of which 46% was from the period of March to July 2021, 33% from August  
250 to December 2021 and 21% from March to June 2022. These findings are presented in figure 4.

251 A total of n=12,518 families were affected from the first and second ASF outbreaks of ASF, of  
252 which 77.3% (n=9,672) were affected in the first outbreak in 2021 while 22.7% (2,846) in the second  
253 outbreak in 2022. The district-wise proportion of families affected from the first and second outbreaks are  
254 presented in figure 5.

## 255 **Discussion**

256 Mizoram is one of major pig rearing Indian states contributing to the 47% of the total Indian pig  
257 population from the Northeast region [3,2,9]. Backyard or small holder pig farms constitute the major  
258 portion of piggery in the state while government and other commercial farm types are less [19, 15].  
259 Therefore, swine diseases are undoubtedly a significant threat to the local livelihood in Mizoram, and the  
260 emergence of two fatal transboundary viral diseases - PRRS and recently ASF in less than 8 years gap not  
261 only destabilized the state's economy but also induced psychosocial trauma [15, 20, 18]. In this article,  
262 we have attempted to dissect the account of ASF outbreaks that occurred for the first time in Mizoram

263 using the data acquired from the Department of Animal Husbandry and Veterinary, Government of  
264 Mizoram. According to the data, we found that the first onset in the state was recorded on March 9, 2021,  
265 at Keitum village in Serchhip district. In the same month, ASF emerged at 1 location each in 5 other  
266 districts - Lunglei on the 21st, Lawngtlai on the 23rd, Siaha on the 26th, Mamit on the 28th and Aizawl on  
267 the 29th. Khawzawl and Kolasib reported their first onset in the month of April, Champhai in May and  
268 Hnahthial in June. By the end of July 2021 ASF had emerged in multiple locations in all 11 districts after  
269 showing a peak in the month of June, and the disease continued to spread till the end of 2021 before re-  
270 emergence in March 2022. Patil *et al* [21] reported similar observations on pattern of close ASF  
271 emergence within the first 3 months of ASF outbreak in Assam and Arunachal Pradesh and hypothesized  
272 such outbreaks as single cluster. They further speculated that the reason for rapid spread of ASF within  
273 this period to be “panic among the farmers thereby opting for distress sale of pigs at less rates”. We  
274 cannot rule out similar events contributing to the ASF peak in Mizoram even with the early advisory  
275 notice and efforts from the Government on compliance to biosecurity measures detailed in the National  
276 Action Plan on ASF [22, 23].

277 First laboratory confirmations by real-time PCR of the outbreaks in March 2021 in Serchhip,  
278 Lunglei and Aizawl were received on April 15, 2021, from the ICAR-National Institute of High Security  
279 Animal Diseases (NIHSAD), Bhopal, while laboratory confirmation for the ASF cases in Mamit was  
280 obtained from Northeast Regional Disease Diagnosis Laboratory, Guwahati. Confirmation of the ASF  
281 cases in Lawngtlai and the rest of the districts and following outbreaks were acquired from Department of  
282 Veterinary Microbiology, College of Veterinary Science and Animal Husbandry, Central Agricultural  
283 University, Aizawl. For the outbreaks in March 2021 the average duration from onset to specimen  
284 submission and specimen submission to laboratory confirmation were 13.2 days and 10 days respectively  
285 which is 23.2 days in average from onset to laboratory confirmation (data not shown). In an exceptional  
286 case, the laboratory confirmation of the March outbreak in Lawngtlai district was received after duration

287 of 76 days despite the time taken for laboratory diagnosis by Department of Veterinary Microbiology was  
288 only 7 days, because the specimen was submitted after 68 days from the reported onset date of ASF in the  
289 district. Interestingly, the highest mortality rate by the end of 2021 was observed in Lawngtlai district  
290 going from 26.1% by mid-2021 to 81% by end of 2021 when the average mortality rate by end of 2021  
291 was only 48.2%. According to the advisories to Indian states on ASF outbreak by Department of Animal  
292 Husbandry and Dairying, Government of India (DADH, GOI) [23] the ICAR-NIHSAD, a reference  
293 laboratory in Bhopal was designated for laboratory confirmation of ASF, however the subsequent  
294 laboratory diagnosis was executed by the Department of Veterinary Microbiology, Central Agriculture  
295 University in Aizawl because of logistic limitations in sending samples by the state to the reference  
296 laboratory owing to Covid-19 restrictions. It is important to note that the onset of ASF in these districts  
297 were detected during the Covid-19 pandemic when inter and intra-state movement restrictions and other  
298 social restrictions were not entirely relaxed. This situation, in addition to the difficult hilly terrain, was an  
299 impeding factor in the timely coordination of specimen collection, dispatch and eventually causing delay  
300 in laboratory confirmation and also compelling the state to rely on the closest laboratory for diagnosis.  
301 Although delay in laboratory confirmation might have some contribution in the cumulative loss due to  
302 ASF, the overall first-time ASF situation could have been far different and complicated without the covid-  
303 19 restrictions keeping in view that ASF virus is highly contagious and resilient that it is easily  
304 disseminated through fomites, meat scraps and handlers [7, 3].

305 Even though the CFR in the outbreaks under current study was reaching upto 100% the average  
306 mortality rate was observed to be 27.6% by mid-2021 and 48.2% by end of 2021, showing an average  
307 increase of 25.3%. Mamit district showed the second highest ASF mortality rate of 40% by mid-2021  
308 next to 41.8% of Lunglei, but showed the second least percent change of 8.9% by end 2021 next to 8.5%  
309 of Khawzawl. Mamit district also showed the least CFR of 76.5% when the average CFR was observed to  
310 be 96.1%. Except Mamit, the CFR remained more or less consistent among the districts, but the polarised

311 pattern of mortality rates among the districts by end of 2021 may have been a result of multifactorial  
312 attributes or determinants that influences the infection rate rather than just the virulence of the virus strain  
313 - varying time of deaths among pigs and size of pig population, time of culling before ASF induced  
314 deaths, distances between farms, biosecurity practices etc. Time of culling may have also influenced the  
315 CFR estimate. For example, the culling rate in Mamit district was 26.8% by mid-2021 and 88.5% by end  
316 of 2021 - the highest among the districts and the culling activity may have removed several infected pigs  
317 that would have otherwise succumbed to ASF induced death at the time of recording the number of deaths  
318 in the district. Hence, the high culling rate may explain the low CFR and low percent change of mortality  
319 rate estimated for Mamit. It was also observed that Lawngtlai district which had 0% culling rate  
320 coincidentally showed 100% CFR and highest percent change of mortality rate. On the contrary,  
321 Khawzawl district which had 0% culling rate showed the lowest percent change of mortality rate. These  
322 varying observations among districts are suggestive of other determinants of mortality rate coming into  
323 play, for instance, the population size of susceptible pigs in Khawzawl was approximately half the  
324 susceptible population in Mamit which may have resulted in a slightly different dynamic of virus  
325 transmission.

326 We observed that pigs above 8 months of age showed the highest ASF induced mortality in  
327 comparison to the other two age groups. Since we could not measure the age-wise mortality rate and  
328 infection rate, it is unclear if the above observation was due to actual difference in age-specific  
329 manifestation or simply a reflection of the age group dominant at the time of the outbreaks. Similarly,  
330 breed-wise response to ASF also remains to be investigated as Mizoram rears different breeds consisting  
331 of imported purebred and crossbred pigs as well as indigenous 'Zovawk', with 80% of the total  
332 population constituted by crossbred [15]. Nevertheless, ASF is of threat to conservation of germ plasm of  
333 'Zovawk'.

334 Information on the second outbreak in 2022 was limited to the cumulative age-wise deaths in each  
335 affected district, therefore, the mortality rate of 2022 could not be calculated. However, comparing the pig  
336 mortality during March to July 2021 and March to June 2022, the mortality in 2022 was 55.2% less than  
337 in 2021. This reduction in pig mortality in 2022 ASF outbreak was observed despite relative relaxation of  
338 Covid-19 restrictions and therefore may be attributed to increased biosecurity and other control measures  
339 in the second outbreak. However, district-wise comparison of mortality between outbreaks in 2021 and  
340 2022 revealed that Champhai district contributed significantly (36.1%) in overall ASF-induced mortality  
341 in 2022 in contrast to 1.6% contribution to overall ASF-induced mortality in 2021. It is the highest of the  
342 only two districts showing spike in the second outbreak, the other being Kolasib contributing 19.7% in  
343 overall mortality in 2022 versus 0.5% in 2021. These findings can be correlated to the fact that Champhai  
344 district lies in the Indo-Myanmar border on the east, and while sharing a biodiverse buffer zone with  
345 Myanmar the district is also an informal trade corridor or ‘porous border’ for unregistered live pig and  
346 pork trade [15, 20]. Kolasib district is also a border district adjoining Cachar district and Hailakandi  
347 district of Assam in the north and northwest, and the main portal connecting Mizoram to the rest of India.

348 So far, two evidence hint the source of ASF in Mizoram and other states of India based on the  
349 genetic analysis of p72 and p54 encoding genes and central variable region of B602L gene. Rajkumar *et*  
350 *al.* showed the genetic similarity of Indian ASF virus associated with the outbreaks in Assam and  
351 Arunachal Pradesh to post-2007-p72-genotype II virus reported from Asia and Europe implicating that the  
352 Indian ASF was an event of transboundary expansion of the Asian ASF [10]. Rajkhowa *et al*  
353 characterized the ASF virus associated with the Mizoram outbreak also as genotype II. However, the  
354 information on B602L gene suggested that the virus was closely linked to the pre-2014 Eurasian strains  
355 and therefore, the Mizoram ASF virus and the other Indian strains belonged to two separate groups which,  
356 according to the authors, indicated that Mizoram ASF has a source different from the other states [18].  
357 Nevertheless, the overall ASF morbidity rate and the mortality rate observed in Mizoram till July 2021 in



358 our study were congruous with the observations of ASF till May 2020 in Assam and Arunachal Pradesh  
359 [21]. Although our study could not encompass the clinical profile of the disease during the outbreak, some  
360 of the clinical manifestations observed by Rajkhowa *et al* in the early outbreaks in Mizoram were severe  
361 depression, high fever, bloody diarrhoea, cutaneous haemorrhages and haemorrhagic lesions in visceral  
362 organs [18]. More structured and in-depth investigation on molecular epidemiology will not only reveal a  
363 clearer picture on the source of ASF virus but also explain the strain-driven basis of the clinical  
364 manifestations and mortality observed.

365 In a recent study in Assam, ASFV genotype-II was also detected in two carcasses of wild boar  
366 from two different national parks collected between 2020 and 2021 and the authors speculate the  
367 transmission of ASF virus from infected domestic pigs during the outbreaks in the region [24]. Moreover,  
368 there is an unofficial report stating the detection of 3 ASF cases in wild boar in Champhai district in July  
369 2022 [25]. Although we are not entirely certain about the sources of these wild boar ASF cases, the  
370 infiltration of ASF virus among wild boar population irrefutably bears adverse consequences - not only as  
371 a threat to the wild life ecology but also as cradle for outbreak perpetuation, hence, further challenging the  
372 ASF mitigation policy as witnessed in countries in Africa, Europe and Asia [8, 12, 23]. With the existing  
373 poor implementation of biosecurity measures [21, 26] and unorganized live pig and pork trade through  
374 ‘porous border’ [15], the consequences of future threats are even more unfathomable in Mizoram.

375 We had also surveyed for ASF IgG in representative pig sera collected in the early 2022 from  
376 farms within the affected districts but did not observe any seropositivity against ASF (data not shown),  
377 which implies absence of live pigs with past exposure to ASF virus. However, this finding cannot truly  
378 represent the actual status due to the small sample size surveyed. The advisories to states on outbreak of  
379 ASF released in June 2019 by DADH, GOI when active outbreaks of ASF were reported in multiple  
380 Asian countries [23] and the formulation of National Action Plan on ASF in June 2020 [22] might have  
381 had some success on ASF management in the country. It is important to note that endemicity isn’t the



382 only threat but the propensity of sporadic events leading to unprecedented outcomes is a factor that  
383 warrants revision of ASF control policies [12]. As unanimously pointed by other researchers [3, 21, 26],  
384 an extensive surveillance is pivotal toward achieving a more accurate assessments of risk factors and  
385 formulation of a practical and feasible mitigation plan tailored according to zones, and implementation  
386 thereof. Efforts to understand the ASF virus adaptation dynamic in the domestic host and wild boar in our  
387 region should also include studying the ecology of susceptible ticks and their possible roles. Continued  
388 concerted efforts between “Veterinary Services, wildlife and forestry authorities” as earlier emphasized  
389 by Sanchez et al [3] is of paramount need to manage the outbreaks in the country, and to mitigate the  
390 impact borne by the disease and risks imposed by ASF in wild boars.

391 Out of 62,895 susceptible pigs we estimated an overall 70% to have been depopulated by disease  
392 and culling by end of 2021. We do not have the information on the status of the remaining 30% pigs  
393 although we assume it to be live pigs. Whether these remaining pigs belonged to the same herd of affected  
394 pigs and likely acquired infection but were missed from the culling program and, if so, contributed to ASF  
395 re-emergence in 2022, or belonged to different unaffected herds or farms outside the culling radius is  
396 unknown to us. So far, in the absence of ASF vaccine and treatment, the most effective control measure  
397 appeared to be depopulation of susceptible pigs by culling [8]. It is understandable that 100%  
398 depopulation is not an economically viable option for ASF management in a state like Mizoram or other  
399 states in the country and, hence, as according to *Patil et al*, ASF is “a permanent threat to Indian pigs”  
400 [21].

401 So far, genotype-II has been dominant outside of African continent and a substantial progress on  
402 the efforts to develop effective vaccines against this genotype have been reported [27,28,29,30].  
403 However, the tendency of other pig-adapted genotypes to expand in unfathomable geographical range  
404 demands a focus on broad spectrum vaccine with stringent biosecurity measures as previously highlighted  
405 in context to circulating ASF virus in African continent [28].

406 **Conclusion**

407 We have presented an account on first ASF emergence in Mizoram, a small northeast state of  
408 India where pig farming is of major cultural and economic significance. The ASF impact is undoubtedly  
409 catastrophic and demands tailored and stringent biosecurity measures. Considering the nature and history  
410 of virus ecology, efforts on continued surveillance for risk factor analysis is of paramount importance.

411 **Acknowledgments**

412 The study was conducted as part of the project titled “Establishment of a Consortium for One  
413 Health to address Zoonotic and Transboundary Diseases in India, including the Northeast Region”  
414 approved by the Department of Biotechnology, Govt. of India with Order No:  
415 BT/PR39032/ADV/90/285/2020 dated 06/08/2021.

416 **Authors’ Contributions**

417 SC conceptualised the study, curated and analysed the data, prepared the visualisation and wrote  
418 the original and final manuscript draft. AR, CN, EL and FL collected and compiled the data. PRC, PKS  
419 and TKD provided the resources. TKD supervised the study and reviewed the manuscript draft.

420

421

422

423

424

425

426

427 **References:**

- 428 1. WOAHA (2018) Infection with African Swine Fever Virus. In Chapter 15.1, Terrestrial Animal Health  
429 Code. [https://www.woah.org/fileadmin/Home/eng/Health\\_standards/tahc/2018/en\\_chapitre\\_asf.htm](https://www.woah.org/fileadmin/Home/eng/Health_standards/tahc/2018/en_chapitre_asf.htm).  
430 Accessed 10 February 2023.
- 431 2. Mohan NHB, Misha MM, Gupta, VK (2021) Consequences of African swine fever in India: Beyond  
432 economic implications. *Transbound Emerg Dis* 68:3009-301. doi.org/10.1111/tbed.14318.
- 433 3. Sánchez-Vizcaíno JM, Martínez-López B, Martínez-Avilés M, Martins C, Boinas F, Vial L, Michaud  
434 V, Jori F, Etter E, Albina E, Roger, F. (2009) Scientific Review on African Swine Fever. Scientific  
435 Report submitted to EFSA, 1-141.
- 436 4. WOAHA (2019) African Swine Fever (Infection with African Swine Fever Virus), In Chapter 3.8.1,  
437 Section 3.8. OIE Terrestrial Manual.  
438 [https://www.woah.org/fileadmin/Home/fr/Health\\_standards/tahm/3.08.01\\_ASF.pdf](https://www.woah.org/fileadmin/Home/fr/Health_standards/tahm/3.08.01_ASF.pdf) Accessed 14  
439 March 2023.
- 440 5. Montgomery, RE (1921) A form of swine fever occurring in British East Africa (Kenya Colony). *J*  
441 *Comp Pathol* 34:159–91. doi.org/10.1016/S0368-1742(21)80031-4.
- 442 6. Simulundu E, Lubaba C, van Heerden J, Kajihara M, Mataa L, Chambaro H, Sinkala Y, Munjita S,  
443 Munang’andu H, Nalubamba K, Samui K, Pandey G, Takada A, Mweene A (2017) The Epidemiology  
444 of African Swine Fever in “Nonendemic” Regions of Zambia (1989–2015): Implications for Disease  
445 Prevention and Control. *Viruses* 9: 236. doi:10.3390/v9090236.
- 446 7. Beltrán-Alcrudo D, Arias M, Gallardo C, Kramer S, Penrith ML (2017) African swine fever: detection  
447 and diagnosis – A manual for veterinarians. FAO Animal Production and Health Manual No. 19.  
448 Rome. Food and Agriculture Organization of the United Nations (FAO). 88 pages.
- 449 8. WOAHA (2022) African Swine Fever (ASF) - Situation report 3, 12/01/2022.  
450 <https://www.woah.org/app/uploads/2022/01/asf-situation-report-3.pdf>. Accessed 7 March 2023.

- 451 9. WOAHA (2022) African Swine Fever (ASF) - Situation report 24, 02/12/2022.  
452 <https://www.woah.org/app/uploads/2022/12/asf-report24.pdf>. Accessed 7 March 2023.
- 453 10. Rajukumar K, Senthilkumar D, Venkatesh G, Singh F, Patil VP, Kombiah S, Tosh C, Dubey CK, Sen  
454 A, Barman NN, Chakravarty A, Dutta B, Pegu SR, Bharali A, Singh VP (2021) Genetic  
455 characterization of African swine fever virus from domestic pigs in India. *Transbound Emerg Dis*  
456 00:1–6. doi.org/10.1111/tbed.13986.
- 457 11. Sánchez-Vizcaíno JM, Mur L, Gomez-Villamandos JC, Carrasco L (2015) An update on the  
458 epidemiology and pathology of African swine fever. *J Comp Pathol* 152: 9-21. doi:  
459 10.1016/j.jcpa.2014.09.003.
- 460 12. WOAHA (2023) Animal Disease Events, WAHIS dashboard. [https://wahis.woah.org/#/event-](https://wahis.woah.org/#/event-management)  
461 [management](https://wahis.woah.org/#/event-management). Accessed 22 March 2023.
- 462 13. Mizoram at a glance (2020) Mizoram Portal, Department of Information & Communications  
463 Technology, Government of Mizoram, India. <https://dict.mizoram.gov.in/>. Accessed 22 March 2023.
- 464 14. Mizoram at a glance (2023) Mizoram state centre, National Information centre, Ministry of  
465 Communication and Information Technology, Government of Mizoram.  
466 <https://mizoram.nic.in/about/glance.htm>. Accessed 22 March 2023.
- 467 15. Lalmangaihsangi R (2018) Livestock value chain in Mizoram: a study of piggery in Aizawl district.  
468 Thesis. Master of Philosophy in Economics, Department of Economics, School of Economics,  
469 Management and Information Sciences, Mizoram University.
- 470 16. 20<sup>th</sup> Livestock Census - All India report (2019) Ministry of Fisheries, Animal Husbandry and  
471 Dairying, Department of Animal Husbandry and Dairying, Animal Husbandry Statistics Division,  
472 Krishi Bhawan, New Delhi.
- 473 17. Mizoram 20<sup>th</sup> LC (2021) Department of Animal Husbandry and Veterinary, Government of Mizoram.

- 474 18. Rajkhowa TK, Kiran J, Hauhnar L, Zodinpui D, Paul A, Sagolsem S (2022) Molecular detection and  
475 characterization of African swine fever virus from field outbreaks in domestic pigs, Mizoram, India.  
476 *Transbound Emerg Dis* 69: e1028-e1036. doi: 10.1111/tbed.14384.
- 477 19. Overview of the Piggery Sector. Department of Animal Husbandry and Dairying, Ministry of  
478 Fisheries, Animal Husbandry and Dairying. Online:  
479 <http://dahd.nic.in/sites/default/files/NAP%20on%20Pig%20.pdf>. Accessed 10 March 2023.
- 480 20. Rajkhowa TK, Mohanarao GJ, Gogoi A, Hauhnar L, Isaac, L (2015) Porcine reproductive and  
481 respiratory syndrome virus (PRRSV) from the first outbreak of India shows close relationship with the  
482 highly pathogenic variant of China. *Vet Q* 35: 186-193, doi:10.1080/01652176.2015.1066043.
- 483 21. Patil SS, Suresh KP, Vashist V, Prajapati A, Pattnaik B, Roy, P (2020) African swine fever: A  
484 permanent threat to Indian pigs. *Vet World* 13: 2275-2285. doi: 10.14202/vetworld.2020.2275-2285.
- 485 22. National Action plan for control, containment and eradication of African Swine Fever (2020) Ministry  
486 of Fisheries, Animal Husbandry and Dairying, Department of Animal Husbandry and Dairying,  
487 Government of India. [https://megahvt.gov.in/miscellaneous/ASF\\_NAP.pdf](https://megahvt.gov.in/miscellaneous/ASF_NAP.pdf). Accessed on 10 March  
488 2023.
- 489 23. Advisories to States on outbreaks of African Swine Fever (ASF) (2019) Department of Animal  
490 Husbandry & Dairying, Ministry of Agriculture and Farmers Welfare, Government of India.  
491 <https://ahvety.mizoram.gov.in/uploads/attachments/754b187ef4f4f7536ddb745bd5d0bab/asf->  
492 [advisory.pdf](https://ahvety.mizoram.gov.in/uploads/attachments/754b187ef4f4f7536ddb745bd5d0bab/asf-advisory.pdf). Accessed 10 March 2023.
- 493 24. Buragohain L, Barman NN, Sen S, Bharali A, Dutta B, Choudhury B, Suresh KP, Gaurav S, Kumar  
494 R, Ali S, Kumar S, Malik, YS (2023) Transmission of African swine fever virus to the wild boars of  
495 Northeast India. *Vet Q* 43: 1-10, doi: 10.1080/01652176.2023.2178689.

- 496 25. African Swine Fever Found in Wild Pigs of Mizoram: Report, August 06, 2022, NDTV. News.  
497 [https://www.ndtv.com/india-news/african-swine-fever-found-in-wild-pigs-of-mizoram-report-](https://www.ndtv.com/india-news/african-swine-fever-found-in-wild-pigs-of-mizoram-report-3231344)  
498 3231344. Accessed 24 March 2023.
- 499 26. Bora M, Bora DP, Manu M, Barman NN, Dutta LJ, Kumar PP, Poovathikkal S, Suresh KP,  
500 Nimmanapalli R (2020) Assessment of Risk Factors of African Swine Fever in India: Perspectives on  
501 Future Outbreaks and Control Strategies. *Pathog* 9:1044. doi: 10.3390/pathogens9121044.
- 502 27. Multiple vaccine candidates in the works for African swine fever, February 03, 2023. American  
503 Veterinary Medical Association. News. [https://www.avma.org/news/multiple-vaccine-candidates-](https://www.avma.org/news/multiple-vaccine-candidates-works-african-swine-fever)  
504 [works-african-swine-fever](https://www.avma.org/news/multiple-vaccine-candidates-works-african-swine-fever). Accessed 24 March 2023.
- 505 28. Penrith ML, Van Heerden J, Heath L, Abworo EO, Bastos ADS (2022) Review of the Pig-Adapted  
506 African Swine Fever Viruses in and Outside Africa. *Pathog* 11,1190. [https://](https://doi.org/10.3390/pathogens11101190)  
507 [doi.org/10.3390/pathogens11101190](https://doi.org/10.3390/pathogens11101190).
- 508 29. Vietnam to begin nationwide distribution of ASF vaccine, February 01, 2023. Feed Strategy. News.  
509 [https://www.feedstrategy.com/african-swine-fever/vietnam-to-begin-nationwide-distribution-of-asf-](https://www.feedstrategy.com/african-swine-fever/vietnam-to-begin-nationwide-distribution-of-asf-vaccine/)  
510 [vaccine/](https://www.feedstrategy.com/african-swine-fever/vietnam-to-begin-nationwide-distribution-of-asf-vaccine/). Accessed 24 March 2023.
- 511 30. Research declares ASF vaccine safe and effective, June 08, 2022. Pig Progress. News.  
512 [https://www.pigprogress.net/health-nutrition/nutrition/research-declares-asf-vaccine-safe-and-](https://www.pigprogress.net/health-nutrition/nutrition/research-declares-asf-vaccine-safe-and-effective/)  
513 [effective/](https://www.pigprogress.net/health-nutrition/nutrition/research-declares-asf-vaccine-safe-and-effective/). Accessed 24 March 2023.
- 514  
515  
516  
517  
518  
519

520 **Figures**

521 Figure 1: ASF epicentres and timeline of ASF appearance in Mizoram. A- Location of first onset of ASF  
522 recorded in 11 districts, B. Month-wise emergence of ASF in 11 districts, C- Heatmap showing  
523 overlapping outbreaks.

524 Figure 2: Impact of ASF outbreak in Mizoram. A- Morbidity rate, mortality rate and case fatality rate  
525 estimated for the outbreak during March 2021 to July 2021, B- District-wise percent change of ASF  
526 mortality rate from mid-2021 to end 2021, C- Overall age-wise, mortality observed in 2021 and 2022, D-  
527 District-wise and age-wise ASF-induced mortality in 2021, E-District-wise and age-wise ASF-induced  
528 mortality in 2022.

529 Figure 3: Depopulation status during the outbreaks of ASF in Mizoram in 2021. A- District-wise culling  
530 of susceptible pigs from March 2021 to December 2021, B- Overall culling rate and depopulation rate in  
531 Mizoram, C- District-wise number of ASF-induced deaths, culled pigs and overall number of pigs  
532 depopulated, D- Status of pig population in the affected locations in every district after depopulation.

533 Figure 4: Overall ASF induced mortality in outbreaks between 2021 and 2022. A- District-wise mortality,  
534 B- Proportion of each district in overall mortality observed in Mizoram, C- Proportion of age group and  
535 outbreak period in the overall mortality.

536 Figure 5: Livelihood affected from ASF outbreaks in Mizoram between 2021 and 2022. A- District-wise  
537 number of families affected, B- District-wise proportion of families affected, C- Year-wise contribution in  
538 total families affected.

539 **Tables**

540 Table 1. Mizoram Pig population in 2019.

541 Table 2. ASF epicentres recorded in 11 districts between March and July 2021.

542 Table 3: ASF scenario in 2021 outbreak.

543 Table 4: Pig depopulation status in 2021 outbreak of ASF.

**Fig 1****A**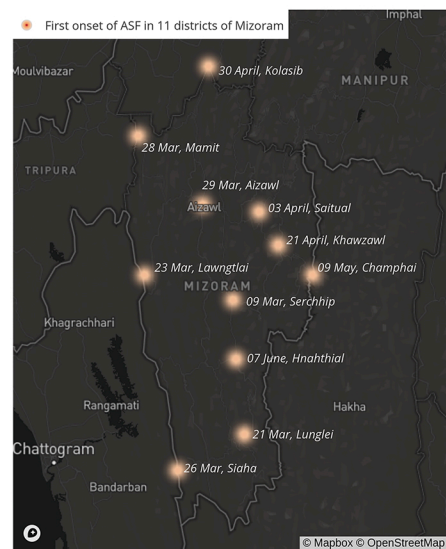**B**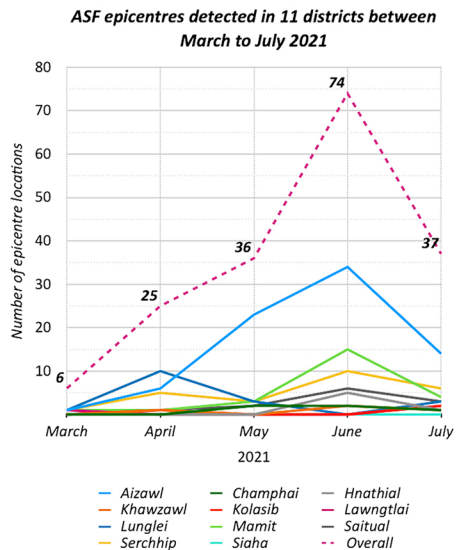**C**

Overall number of epicentres with overlapping month

No. of districts with overlapping month

No. of districts with overlapping dates

Number of epicentres with overlapping dates

No. of overlapping dates with ASF outbreak in multiple locations

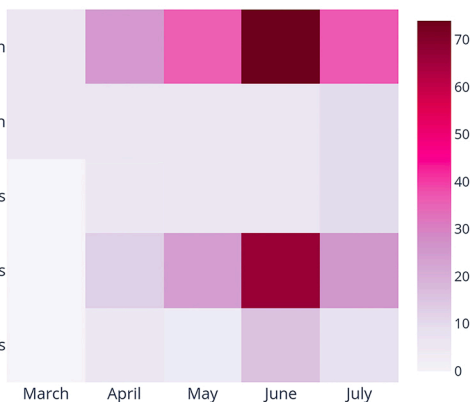**2021**



**Fig 2****A**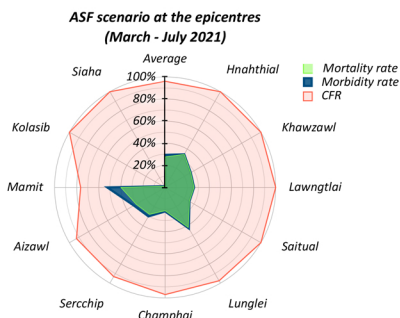**B**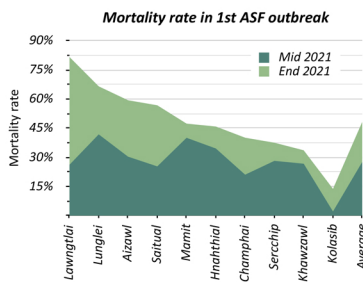**C**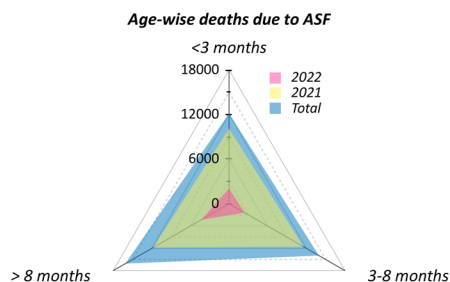**D**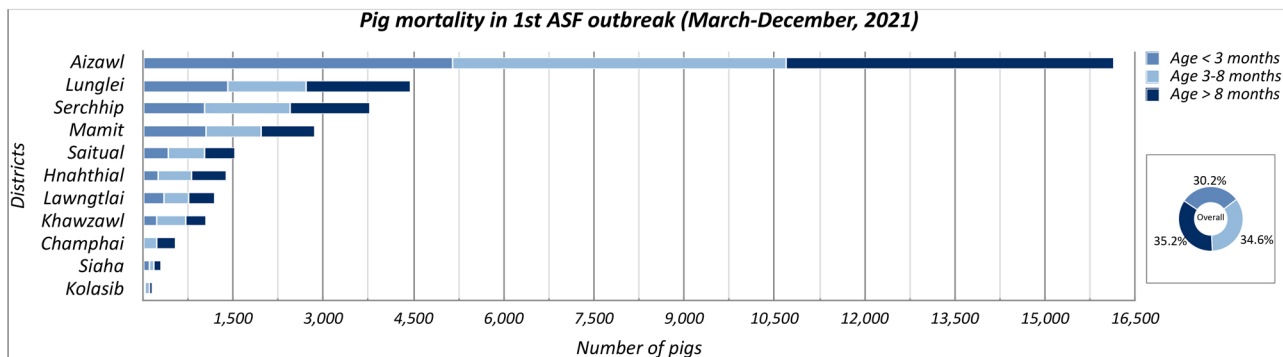**E**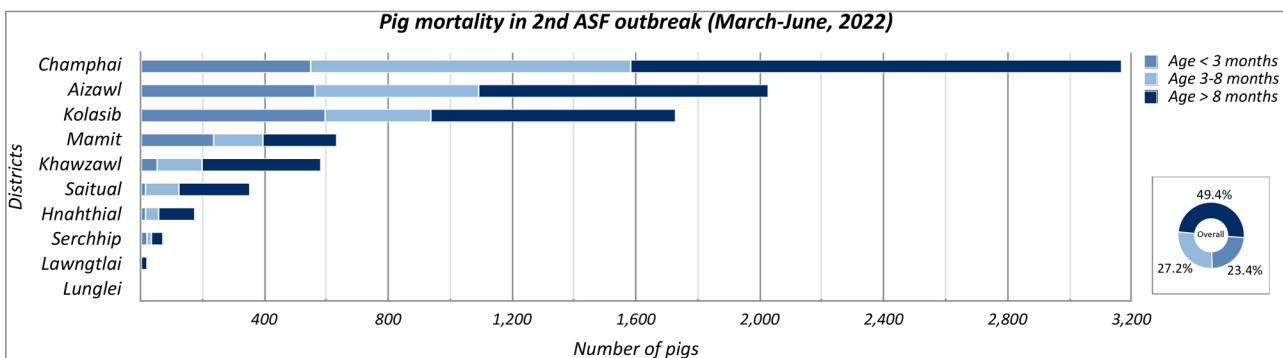

**Fig 3****A**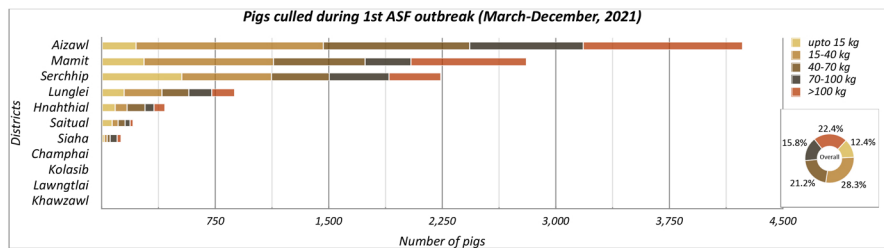**B**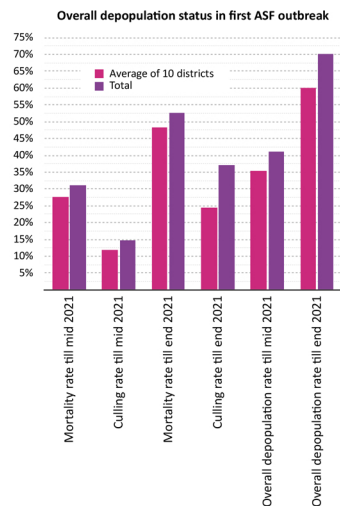**C**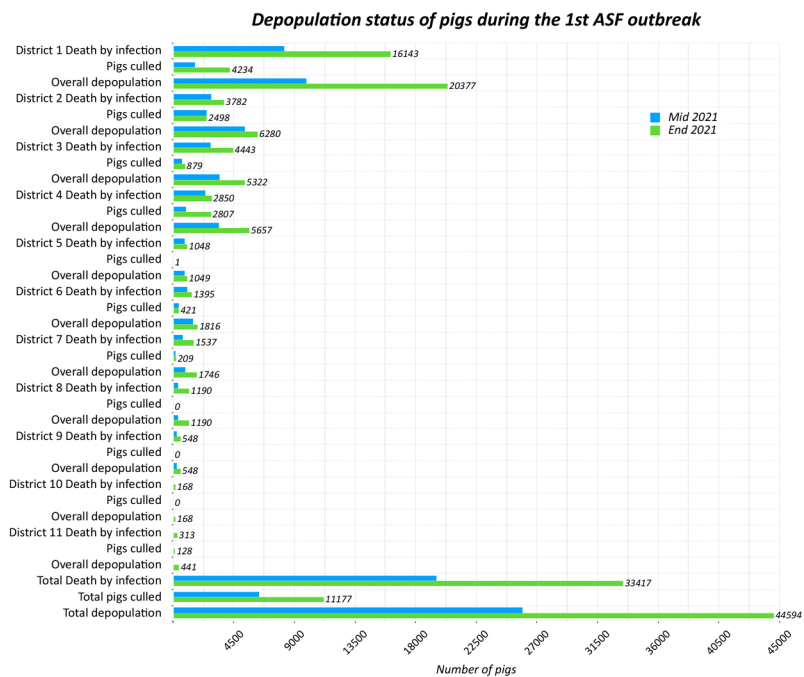**D**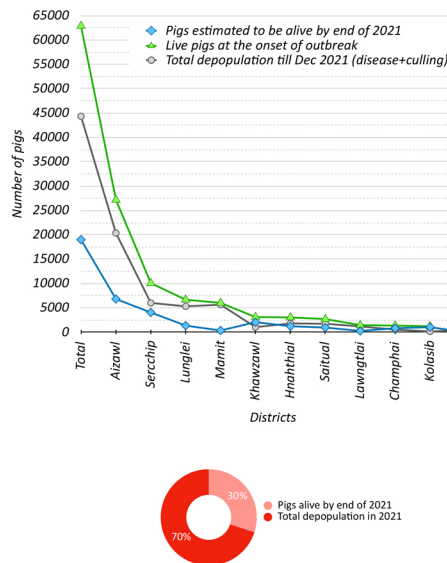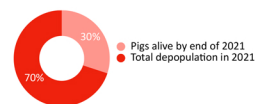

**Fig 4**

**A**

**ASF induced mortality in 1st vs 2nd outbreak**

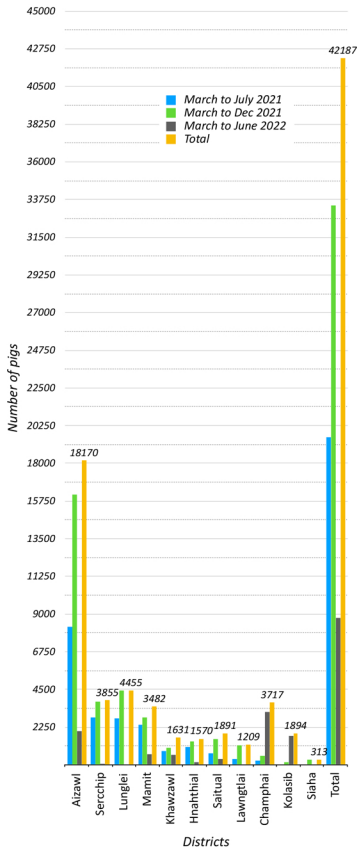

**B**

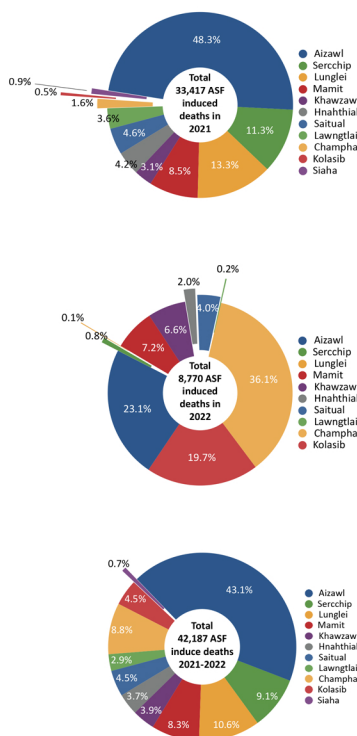

**C**

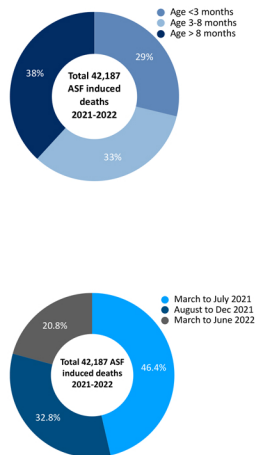

**Fig 5****A**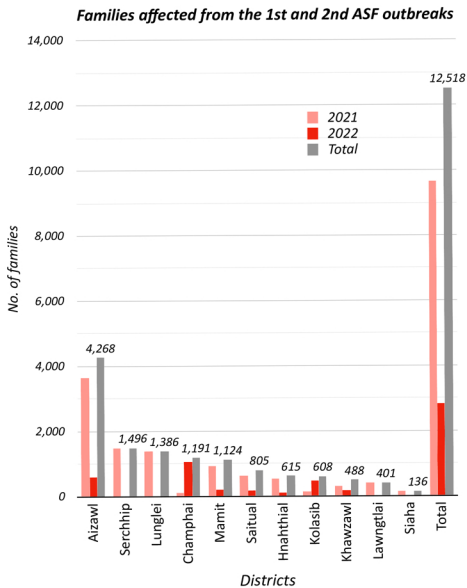**B**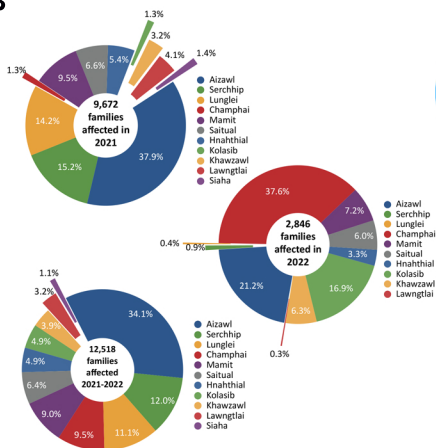**C**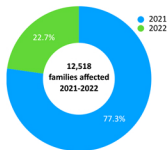

**Table 1. Mizoram Pig population in 2019**

| <b>District</b>  | <b>Area (Sq km)</b> | <b>Number of pigs</b> | <b>Source</b>         |
|------------------|---------------------|-----------------------|-----------------------|
| <b>Aizawl</b>    | 3576                | 68,218                |                       |
| <b>Kolasib</b>   | 1383                | 35,390                |                       |
| <b>Lunglei</b>   | 4538                | 30,839                |                       |
| <b>Mamit</b>     | 3026                | 25,910                |                       |
| <b>Champhai</b>  | 3186                | 23,598                |                       |
| <b>Saitual</b>   | -                   | 23,242                | 20th Livestock census |
| <b>Lawngtlai</b> | 2557                | 21,222                | [16, 17]              |
| <b>Siaha</b>     | 1400                | 17,651                |                       |
| <b>Serchhip</b>  | 1422                | 16,794                |                       |
| <b>Khawzawl</b>  | -                   | 15,172                |                       |
| <b>Hnahthial</b> | -                   | 4,985                 |                       |
| <b>Total</b>     | 21,087              | 2,83,021              |                       |

**Table 2. ASF epicentres recorded in 11 districts between March and July 2021**

| District     | Aizawl | Champhai | Hnathial | Khawzawl | Kolasib | Lawngtlai | Lunglei | Mamit | Saitual | Serchhip | Siaha | Overall number of epicentres with overlapping month | No of districts with overlapping month |
|--------------|--------|----------|----------|----------|---------|-----------|---------|-------|---------|----------|-------|-----------------------------------------------------|----------------------------------------|
| <b>March</b> | 1      | 0        | 0        | 0        | 0       | 1         | 1       | 1     | 0       | 1        | 1     | 6                                                   | 6                                      |
| <b>April</b> | 6      | 0        | 0        | 1        | 1       | 0         | 10      | 1     | 1       | 5        | 0     | 25                                                  | 7                                      |
| <b>May</b>   | 23     | 2        | 0        | 0        | 0       | 0         | 3       | 3     | 2       | 3        | 0     | 36                                                  | 6                                      |
| <b>June</b>  | 34     | 2        | 5        | 2        | 0       | 0         | 0       | 15    | 6       | 10       | 0     | 74                                                  | 7                                      |
| <b>July</b>  | 14     | 1        | 1        | 1        | 2       | 2         | 3       | 4     | 3       | 6        | 0     | 37                                                  | 10                                     |
| <b>Total</b> | 78     | 5        | 6        | 4        | 3       | 3         | 17      | 24    | 12      | 25       | 1     | 178                                                 |                                        |

**Table 3: ASF scenario in 2021 outbreak**

medRxiv preprint doi: <https://doi.org/10.1101/2024.09.09.24313373>; this version posted September 11, 2024. The copyright holder for this preprint (which was not certified by peer review) is the author/funder, who has granted medRxiv a license to display the preprint in perpetuity. All rights reserved. No reuse allowed without permission.

| District       | No. of susceptible pigs | March to July 2021                      |                |                                     |                |        | March to Dec 2021                   |                |
|----------------|-------------------------|-----------------------------------------|----------------|-------------------------------------|----------------|--------|-------------------------------------|----------------|
|                |                         | Clinically determined cases (Morbidity) | Morbidity rate | Deaths due to infection (mortality) | Mortality rate | CFR    | Deaths due to infection (mortality) | Mortality rate |
| Aizawl         | 27,197                  | 8,907                                   | 32.7%          | 8,253                               | 30.3%          | 92.7%  | 16,143                              | 59.4%          |
| Sercchip       | 10,082                  | 3,049                                   | 30.2%          | 2,841                               | 28.2%          | 93.2%  | 3,782                               | 37.5%          |
| Lunglei        | 6,681                   | 2,863                                   | 42.9%          | 2,793                               | 41.8%          | 97.6%  | 4,443                               | 66.5%          |
| Mamit          | 6,022                   | 3,153                                   | 52.4%          | 2,411                               | 40.0%          | 76.5%  | 2,850                               | 47.3%          |
| Khawzawl       | 3,118                   | 833                                     | 26.7%          | 833                                 | 26.7%          | 100.0% | 1,048                               | 33.6%          |
| Hnahthial      | 3,043                   | 1,051                                   | 34.5%          | 1,051                               | 34.5%          | 100.0% | 1,395                               | 45.8%          |
| Saitual        | 2,708                   | 686                                     | 25.3%          | 686                                 | 25.3%          | 100.0% | 1,537                               | 56.8%          |
| Lawngtlai      | 1,458                   | 381                                     | 26.1%          | 381                                 | 26.1%          | 100.0% | 1,190                               | 81.6%          |
| Champhai       | 1,367                   | 297                                     | 21.7%          | 288                                 | 21.1%          | 97.0%  | 548                                 | 40.1%          |
| Kolasib        | 1,219                   | 26                                      | 2.1%           | 26                                  | 2.1%           | 100.0% | 168                                 | 13.8%          |
| Siaha          | -                       | 4                                       | -              | 4                                   | -              | 100.0% | 313                                 | -              |
| <i>Total</i>   | 62,895                  | 21,250                                  |                | 19,567                              |                |        | 33,417                              |                |
| <i>Average</i> |                         |                                         | 29.5%          |                                     | 27.6%          | 96.1%  |                                     | 48.2%          |

**Table 4: Pig depopulation status in 2021 outbreak of ASF**

medRxiv preprint doi: <https://doi.org/10.1101/2024.09.09.24313379>; this version posted September 11, 2024. The copyright holder for this preprint (which was not certified by peer review) is the author/funder, who has granted medRxiv a license to display the preprint in perpetuity. All rights reserved. No reuse allowed without permission.

| District                       | Depopulation         | Mid 2021 | End 2021 |
|--------------------------------|----------------------|----------|----------|
| <b>District 1 (Aizawl)</b>     | Death by infection   | 8,253    | 16,143   |
|                                | Pigs culled          | 1,619    | 4,234    |
|                                | Overall depopulation | 9,872    | 20,377   |
| <b>District 2 (Serrchip)</b>   | Death by infection   | 2,841    | 3,782    |
|                                | Pigs culled          | 2,498    | 2,498    |
|                                | Overall depopulation | 5,339    | 6,280    |
| <b>District 3 (Lunglei)</b>    | Death by infection   | 2,793    | 4,443    |
|                                | Pigs culled          | 654      | 879      |
|                                | Overall depopulation | 3,447    | 5,322    |
| <b>District 4 (Mamit)</b>      | Death by infection   | 2,411    | 2,850    |
|                                | Pigs culled          | 969      | 2,807    |
|                                | Overall depopulation | 3,380    | 5,657    |
| <b>District 5 (Khawzawl)</b>   | Death by infection   | 833      | 1,048    |
|                                | Pigs culled          | 1        | 1        |
|                                | Overall depopulation | 834      | 1,049    |
| <b>District 6 (Hnaththial)</b> | Death by infection   | 1,051    | 1,395    |
|                                | Pigs culled          | 421      | 421      |
|                                | Overall depopulation | 1,472    | 1,816    |
| <b>District 7 (Saitual)</b>    | Death by infection   | 686      | 1,537    |
|                                | Pigs culled          | 194      | 209      |
|                                | Overall depopulation | 880      | 1,746    |
| <b>District 8 (Lawngtlai)</b>  | Death by infection   | 381      | 1,190    |
|                                | Pigs culled          | 0        | 0        |
|                                | Overall depopulation | 381      | 1,190    |
| <b>District 9 (Champhai)</b>   | Death by infection   | 288      | 548      |
|                                | Pigs culled          | 0        | 0        |
|                                | Overall depopulation | 288      | 548      |
| <b>District 10 (Kolasib)</b>   | Death by infection   | 26       | 168      |
|                                | Pigs culled          | 0        | 0        |
|                                | Overall depopulation | 26       | 168      |
| <b>District 11 (Siaha)</b>     | Death by infection   | 4        | 313      |
|                                | Pigs culled          | 4        | 128      |
|                                | Overall depopulation | 8        | 441      |
| <b>Total</b>                   | Death by infection   | 19,567   | 33,417   |
|                                | Total pigs culled    | 6,360    | 11,177   |
|                                | Total depopulation   | 25,927   | 44,594   |
